# Supplementary material for: Uncovering the anti-proliferation mechanism and bioactive compounds in red kidney bean coat against B16-F10 melanoma cells by metabolomics and network pharmacology analysis
Source: Royal Society of Chemistry journal article supplement (doi:10.1039/c8fo01738g), 2019-01-01
Supplement: c8fo01738g1.pdf [file c8fo01738g1.pdf]

**Table S1.** Nuclear magnetic resonance characteristic signals of identified metabolites in red kidney bean.

| No. | Metabolites    | Assignment                       | $\delta$ <sup>1</sup> H multiplicity | Source |
|-----|----------------|----------------------------------|--------------------------------------|--------|
| 1   | Valine         | $\gamma'$ -CH <sub>3</sub>       | 1.01 (d,6.6 Hz),                     | K&C    |
|     |                | $\gamma$ -CH <sub>3</sub>        | 1.06 (d,7.2 Hz)                      |        |
| 2   | Lactate        | $\beta$ -CH <sub>3</sub>         | 1.34 (d,6.6 Hz)                      | K&C    |
| 3   | Threonine      | CH <sub>3</sub>                  | 1.35(d,4.8 Hz)                       | K&C    |
| 4   | Alanine        | $\beta$ -CH <sub>3</sub>         | 1.49 (d,7.2 Hz)                      | K&C    |
| 5   | Arginine       | $\beta$ -CH <sub>2</sub>         | 1.70                                 | K&C    |
|     |                | $\gamma$ -CH <sub>2</sub>        | 1.9 (m)                              |        |
| 6   | Acetic acid    | CH <sub>3</sub>                  | 1.93 (s)                             | K&C    |
| 7   | Acetamide      | CH <sub>3</sub>                  | 1.99 (s)                             | K&C    |
| 8   | GABA           | $\alpha$ -CH <sub>2</sub>        | 2.30 (t, 7.8 Hz)                     | K&C    |
| 9   | Pyruvic acid   | CH <sub>3</sub>                  | 2.36 (s)                             | K&C    |
| 10  | Succinic acid  | CH <sub>2</sub>                  | 2.44 (s)                             | K&C    |
| 11  | Citrate        | $\alpha$ -CH <sub>2</sub>        | 2.55 (d,16.2 Hz),                    | K&C    |
|     |                | $\alpha'$ -CH <sub>2</sub>       | 2.71 (d,16.2 Hz)                     |        |
| 12  | Trimethylamine | CH <sub>3</sub>                  | 2.88 (s)                             | K&C    |
| 13  | Choline        | N(CH <sub>3</sub> ) <sup>+</sup> | 3.19 (s)                             | K&C    |
| 14  | Betaine        | N(CH <sub>3</sub> ) <sup>+</sup> | 3.27 (s)                             | C      |
| 15  | Fucose         | 1-H                              | 4.55 (d,7.8 Hz)                      | C      |
|     |                |                                  | 5.18 (d,3.6 Hz)                      |        |
| 16  | Galactose      | 1-H                              | 4.61 (d,7.8 Hz)                      | C      |
|     |                |                                  | 5.22 (d,3.6 Hz)                      |        |
| 17  | Glucose        | 1-H                              | 4.64 (d,7.8 Hz)                      | C      |
|     |                |                                  | 5.21 (d,3.6 Hz)                      |        |
| 18  | Lactose        | 1-H                              | 4.72 (d,7.2 Hz)                      | C      |
| 19  | Raffinose      | 1-H                              | 4.97 (d,3.6 Hz)                      | K&C    |
| 20  | Stachyose      | 1-H                              | 4.98 (d,3.0 Hz)                      | K&C    |
| 21  | Sucrose        |                                  | 5.42 (d,3.6 Hz)                      | K&C    |
| 22  | Fumaric acid   | CH                               | 6.53 (s)                             | K&C    |
| 23  | Unknown        |                                  | 8.04(t, 7.8 Hz)                      | C      |
|     |                |                                  | 9.11(s)                              |        |
| 24  | Formic acid    | H-C=O                            | 8.47 (s)                             | K&C    |
|     |                | 2'-H                             | 6.03(d, 6.6 Hz)                      |        |
| 25  | Adenosine      | 2-H                              | 8.24 (s)                             | K      |
|     |                | 8-H                              | 8.36 (s)                             |        |
| 26  | Tyrosine       | 2-H                              | 6.86 (d, 8.4 Hz)                     | K      |
|     |                | 3-H                              | 7.19 (d, 8.4 Hz)                     |        |
| 27  | Phenylalanine  | Ar-CH                            | 7.4 (t, 7.8 Hz)                      | K      |
| 28  | Uridine        | 1'-CH                            | 5.91 (d, 4.2 Hz)                     | K      |
|     |                | 2=CH                             | 7.94 (d,7.8 Hz)                      |        |
| 29  | Trigonelline   | 8-H                              | 4.46 (s)                             | K      |
|     |                | 4-H                              | 8.11 (dd, 6.6 Hz,7.8Hz)              |        |

|     |                           |
|-----|---------------------------|
| 5-H | 8.87 (dd, 7.8 Hz, 6.6 Hz) |
| 2-H | 9.16 (s)                  |

---

<sup>a</sup> Peaks observed as singlet (s), doublet (d), triplet (t), quartet (q), and multiplet (m).

<sup>b</sup> “C” stands for coat and “K” represents kernel.

**Table S2.** Identification of compounds in red kidney bean by UPLC-MS data.

| No. | t <sub>R</sub> | Molecular Formula                               | Selected ion       | Experimental | Theoretical | MS/MS fragmentaion                                                        | Identification                 | Source |
|-----|----------------|-------------------------------------------------|--------------------|--------------|-------------|---------------------------------------------------------------------------|--------------------------------|--------|
| 30  | 3.43           | C <sub>7</sub> H <sub>6</sub> O <sub>4</sub>    | [M-H] <sup>-</sup> | 153.0188     | 153.0182    | 109.0287                                                                  | Protocatechuic acid            | C      |
| 31  | 3.73           | C <sub>30</sub> H <sub>26</sub> O <sub>12</sub> | [M-H] <sup>-</sup> | 577.1351     | 577.1340    | 407.0768,289.0723, 245.0823,161.0241, 125.0237                            | B-type procyanidin dimer       | C      |
| 32  | 3.93           | C <sub>45</sub> H <sub>38</sub> O <sub>18</sub> | [M-H] <sup>-</sup> | 865.1988     | 865.1974    | 407.0782,289.0725, 245.0829, 125.0238                                     | B-type procyanidin trimer      | C      |
| 33  | 4.45           | C <sub>15</sub> H <sub>14</sub> O <sub>6</sub>  | [M-H] <sup>-</sup> | 289.0720     | 289.0707    | 271.0612,245.0819,227.0711,221.0815, 205.0504,179.0345, 125.0236,109.0287 | (-)-Epicatechin                | C      |
| 34  | 7.24           | C <sub>30</sub> H <sub>26</sub> O <sub>12</sub> | [M-H] <sup>-</sup> | 577.1351     | 577.1340    | 407.0772,289.0724, 245.0815,161.0241, 125.0235                            | B-type procyanidin dimer       | C      |
| 35  | 9.03           | C <sub>26</sub> H <sub>28</sub> O <sub>16</sub> | [M+H] <sup>+</sup> | 597.1448     | 597.1450    | 303.0498                                                                  | Quercetin-3-O-arabinoglucoside | C      |
| 36  | 12.14          | C <sub>21</sub> H <sub>20</sub> O <sub>12</sub> | [M-H] <sup>-</sup> | 463.0886     | 463.0871    | 300.0279                                                                  | Quercetin-3-O-hexoside         | C      |
| 37  | 14.90          | C <sub>21</sub> H <sub>20</sub> O <sub>11</sub> | [M-H] <sup>-</sup> | 447.0937     | 447.0922    | 284.0330, 255.0299, 227.0349, 151.0034                                    | Kaempferol-3-O-glucoside       | C      |
| 38  | 10.97          | C <sub>27</sub> H <sub>31</sub> O <sub>16</sub> | [M+H] <sup>+</sup> | 611.1606     | 611.1606    | 303.0497                                                                  | Rutinum                        | C      |
| 39  | 22.82          | C <sub>15</sub> H <sub>10</sub> O <sub>7</sub>  | [M-H] <sup>-</sup> | 301.0356     | 301.0342    | 273.0414,257.0458, 229.0513,178.9982                                      | Quercetin                      | C      |
| 40  | 25.91          | C <sub>15</sub> H <sub>10</sub> O <sub>6</sub>  | [M-H] <sup>-</sup> | 285.0407     | 285.0394    | 285.0407                                                                  | Kaempferol                     | C      |
| 41  | 11.89          | C <sub>21</sub> H <sub>21</sub> O <sub>12</sub> | [M] <sup>+</sup>   | 465.1026     | 465.1027    | 303.0499                                                                  | Delphinidin 3-O-glucoside      | C      |
| 42  | 14.89          | C <sub>21</sub> H <sub>21</sub> O <sub>11</sub> | [M] <sup>+</sup>   | 449.1075     | 449.1078    | 287.0548                                                                  | Cyanidin-3-O-glucoside         | C      |
| 43  | 16.52          | C <sub>15</sub> H <sub>11</sub> O <sub>7</sub>  | [M] <sup>+</sup>   | 303.0497     | 303.0499    | 285.0393                                                                  | Delphinidin                    | C      |

|    |       |                                                 |                    |           |           |                             |                       |   |
|----|-------|-------------------------------------------------|--------------------|-----------|-----------|-----------------------------|-----------------------|---|
| 44 | 25.93 | C <sub>15</sub> H <sub>11</sub> O <sub>6</sub>  | [M] <sup>+</sup>   | 287.0548  | 287.0550  | 287.0548                    | Cyanidin              | C |
| 45 | 21.54 | C <sub>48</sub> H <sub>78</sub> O <sub>19</sub> | [M+H] <sup>+</sup> | 959.5204  | 959.5210  | 441.3718,423.3613, 405.3509 | Soyasaponin Ba<br>(V) | K |
| 46 | 22.09 | C <sub>48</sub> H <sub>78</sub> O <sub>18</sub> | [M+H] <sup>+</sup> | 943.5256  | 943.5261  | 441.3727,423.3616, 405.3508 | Soyasaponin Bb<br>(I) | K |
| 47 | 24.16 | C <sub>54</sub> H <sub>84</sub> O <sub>22</sub> | [M+H] <sup>+</sup> | 1085.5542 | 1085.5527 | 423.3617, 405.3511          | Soyasaponin αg        | K |
| 48 | 24.37 | C <sub>54</sub> H <sub>84</sub> O <sub>21</sub> | [M+H] <sup>+</sup> | 1069.5590 | 1069.5578 | 423.3619, 405.3512          | Soyasaponin βg        | K |
| 49 | 24.76 | C <sub>48</sub> H <sub>74</sub> O <sub>17</sub> | [M+H] <sup>+</sup> | 923.4987  | 923.4998  | 423.3617, 405.3507          | Soyasaponin γg        | K |

<sup>b</sup>“C” stands for coat and “K” represents kernel.

**Table S3.** The differential metabolites in B16-F10 cell after treatment of RKBC.

| No | t <sub>R</sub> | Molecular Formula                                               | Selected ion       | Experimental | Theoretical | MS/MS fragmentaion                                                             | Identification                  |
|----|----------------|-----------------------------------------------------------------|--------------------|--------------|-------------|--------------------------------------------------------------------------------|---------------------------------|
| 1  | 4.03           | C <sub>12</sub> H <sub>25</sub> N <sub>5</sub> O <sub>3</sub>   | [M+H] <sup>+</sup> | 288.2031     | 288.2030    | 271.1755, 270.1911,<br>253.1662, 175.1191,<br>86.0970                          | Leucylarginine                  |
| 2  | 4.93           | C <sub>10</sub> H <sub>18</sub> N <sub>2</sub> O <sub>5</sub>   | [M+H] <sup>+</sup> | 247.1292     | 247.1288    | 229.1182, 201.1234,<br>184.0968, 183.1128,<br>132.1021, 86.0969                | L-beta-aspartyl-L-leucine       |
| 3  | 4.97           | C <sub>12</sub> H <sub>16</sub> N <sub>2</sub> O <sub>4</sub>   | [M+H] <sup>+</sup> | 253.1184     | 253.1183    | 253.1184, 235.1077,<br>207.1128, 189.1021,<br>148.0755, 120.0810,<br>103.0546  | Phenylalanyl-Serine             |
| 4  | 4.92           | C <sub>9</sub> H <sub>17</sub> NO <sub>5</sub>                  | [M-H] <sup>-</sup> | 218.1025     | 218.1023    | 146.0811, 99.0439,<br>88.0392, 71.0126                                         | Pantothenic acid                |
| 5  | 2.65           | C <sub>9</sub> H <sub>16</sub> N <sub>2</sub> O <sub>5</sub>    | [M-H] <sup>-</sup> | 231.0977     | 231.0975    | 187.1078, 169.0969,<br>213.0872, 115.0025,<br>132.0299                         | Valyl-Aspartate                 |
| 6  | 4.99           | C <sub>13</sub> H <sub>18</sub> N <sub>2</sub> O <sub>4</sub>   | [M-H] <sup>-</sup> | 265.1185     | 265.1182    | 247.1073, 221.0922,<br>164.0706, 147.0440,<br>73.0395                          | Threoninyl-Phenylalanine        |
| 7  | 4.56           | C <sub>10</sub> H <sub>14</sub> N <sub>5</sub> O <sub>6</sub> P | [M+H] <sup>+</sup> | 332.0754     | 332.0754    | 136.0620, 81.0341                                                              | Deoxyadenosine<br>monophosphate |
| 8  | 4.90           | C <sub>10</sub> H <sub>20</sub> N <sub>2</sub> O <sub>4</sub>   | [M+H] <sup>+</sup> | 233.1498     | 233.1496    | 215.1392, 187.1442,<br>169.1336, 132.1020,<br>86.0970, 74.0607                 | Threoninyl-Leucine              |
| 9  | 4.68           | C <sub>8</sub> H <sub>11</sub> NO <sub>3</sub>                  | [M-H] <sup>-</sup> | 168.0656     | 168.0655    | 166.0498, 150.0549,<br>138.0549, 122.0599,<br>121.0520,<br>270.1932, 271.1761, | Pyridoxine                      |
| 10 | 4.80           | C <sub>12</sub> H <sub>25</sub> N <sub>5</sub> O <sub>3</sub>   | [M+H] <sup>+</sup> | 288.2031     | 288.2030    | 253.1658, 157.1083,<br>112.0872, 86.0969,<br>70.0657, 69.0704                  | Arginyl-Leucine                 |
| 11 | 5.02           | C <sub>14</sub> H <sub>18</sub> N <sub>2</sub> O <sub>5</sub>   | [M-H] <sup>-</sup> | 293.1138     | 293.1131    | 275.1029, 249.1229,<br>231.1131, 164.0706,<br>147.0440, 127.0501               | gamma-<br>Glutamylphenylalanine |
| 12 | 2.21           | C <sub>10</sub> H <sub>16</sub> N <sub>2</sub> O <sub>7</sub>   | [M-H] <sup>-</sup> | 275.088      | 275.0873    | 257.0772, 231.0982,<br>213.0868, 146.0448,<br>128.0341                         | gamma-Glutamylglutamic acid     |
| 13 | 3.77           | C <sub>10</sub> H <sub>18</sub> N <sub>2</sub> O <sub>5</sub>   | [M-H] <sup>-</sup> | 245.1134     | 245.1132    | 227.1028, 228.1052,<br>201.1236, 116.0705                                      | Glutamylvaline                  |
| 14 | 4.91           | C <sub>9</sub> H <sub>18</sub> N <sub>2</sub> O <sub>4</sub>    | [M-H] <sup>-</sup> | 217.1184     | 217.1183    | 187.1077, 130.0861,<br>143.1178, 146.0811,<br>169.0967                         | Pantothenamide                  |

|    |           |                                                                 |                    |          |          |                                                                                                                |                                    |
|----|-----------|-----------------------------------------------------------------|--------------------|----------|----------|----------------------------------------------------------------------------------------------------------------|------------------------------------|
| 15 | 5.49      | C <sub>18</sub> H <sub>35</sub> N <sub>3</sub> O <sub>4</sub>   | [M-H] <sup>-</sup> | 356.2546 | 356.2544 | 312.2644, 225.1596,<br>130.0862, 199.1804                                                                      | Leu-Leu-Leu                        |
| 16 | 5.13      | C <sub>14</sub> H <sub>20</sub> N <sub>2</sub> O <sub>3</sub>   | [M-H] <sup>-</sup> | 263.1396 | 263.1390 | 219.1493, 164.0706,<br>115.0865, 91.0541                                                                       | Valyl-Phenylalanine                |
| 17 | 4.78      | C <sub>11</sub> H <sub>20</sub> N <sub>2</sub> O <sub>5</sub>   | [M-H] <sup>-</sup> | 259.1292 | 259.1288 | 241.1183, 215.1392,<br>171.1492, 130.0862,<br>102.0549                                                         | gamma-Glutamylleucine              |
| 18 | 5.09      | C <sub>12</sub> H <sub>24</sub> N <sub>2</sub> O <sub>3</sub>   | [M-H] <sup>-</sup> | 243.1707 | 243.1703 | 199.1807, 197.1646,<br>130.0862                                                                                | Leucyl-Isoleucine                  |
| 19 | 10.5<br>4 | C <sub>27</sub> H <sub>51</sub> O <sub>12</sub> P               | [M-H] <sup>-</sup> | 597.3030 | 597.3034 | 281.2479, 78.9578,<br>241.0110, 259.0211,<br>315.0480, 152.9947                                                | 1-<br>Oleoylglycerophosphoinositol |
| 20 | 4.09      | C <sub>10</sub> H <sub>13</sub> N <sub>4</sub> O <sub>8</sub> P | [M-H] <sup>-</sup> | 347.0390 | 347.0387 | 211.0004, 150.9784,<br>135.0302, 96.9684,<br>78.9578, 92.0240                                                  | Inosinic acid                      |
| 21 | 12.9<br>2 | C <sub>25</sub> H <sub>48</sub> NO <sub>7</sub> P               | [M-H] <sup>-</sup> | 504.3087 | 504.3085 | 307.2635, 140.0110,<br>214.0479, 196.0372,<br>152.9947, 78.9580                                                | LysoPE(20:2(11Z,14Z)/0:0)          |
| 22 | 7.79      | C <sub>18</sub> H <sub>34</sub> O <sub>5</sub>                  | [M-H] <sup>-</sup> | 329.2326 | 329.2323 | 99.0801, 127.1119,<br>139.1119, 157.1219,<br>171.1015, 201.1100,<br>211.1331, 229.1438,<br>309.2791, 214.0477, | 9,10,13-TriHOME                    |
| 23 | 13.8<br>8 | C <sub>25</sub> H <sub>50</sub> NO <sub>7</sub> P               | [M-H] <sup>-</sup> | 506.3234 | 506.3241 | 196.0371, 78.9578,<br>140.0107                                                                                 | LysoPE(20:1(11Z)/0:0)              |
| 24 | 11.1<br>6 | C <sub>23</sub> H <sub>44</sub> NO <sub>7</sub> P               | [M+H] <sup>+</sup> | 478.2931 | 478.2928 | 337.2738, 263.2376,<br>216.0634, 121.1014,<br>81.0704                                                          | LysoPE(0:0/18:2(9Z,12Z))           |
| 25 | 4.70      | C <sub>10</sub> H <sub>14</sub> N <sub>5</sub> O <sub>8</sub> P | [M+H] <sup>+</sup> | 364.0652 | 364.0653 | 152.0569, 135.0304,<br>110.0352, 97.0288                                                                       | Guanosine monophosphate            |
| 26 | 3.40      | C <sub>10</sub> H <sub>14</sub> N <sub>5</sub> O <sub>7</sub> P | [M+H] <sup>+</sup> | 348.0703 | 348.0704 | 136.0619, 250.0934                                                                                             | Adenosine monophosphate            |
| 27 | 10.5<br>6 | C <sub>21</sub> H <sub>42</sub> NO <sub>7</sub> P               | [M+H] <sup>+</sup> | 452.2772 | 452.2772 | 311.2582, 237.2216,<br>219.2108, 216.0627,<br>198.0526                                                         | LysoPE(0:0/16:1(9Z))               |
| 28 | 7.74      | C <sub>13</sub> H <sub>25</sub> NO <sub>3</sub>                 | [M+H] <sup>+</sup> | 244.1908 | 244.1907 | 226.1803, 198.1856,<br>83.0861, 85.1016,<br>97.1016                                                            | N-Undecanoylglycine                |
| 29 | 4.28      | C <sub>10</sub> H <sub>14</sub> N <sub>5</sub> O <sub>8</sub> P | [M+H] <sup>+</sup> | 364.0652 | 364.0653 | 152.0569, 135.0306                                                                                             | Cyclic GMP                         |

**Table S4.** KEGG pathway enrichment for the targets of RKBC.

| Term                                 | P-value | FDR     | Genes                                                                                                                                       |
|--------------------------------------|---------|---------|---------------------------------------------------------------------------------------------------------------------------------------------|
| Melanoma                             | 0.0000  | 0.0000  | PIK3CG, HRAS, IGF1, CDK6, HGF, CDK4, AKT1, IGF1R, MAPK1, KRAS, ARAF, MAPK3, FGF2, PIK3R1, AKT2                                              |
| VEGF signaling pathway               | 0.0000  | 0.0000  | PRKCA, PIK3CG, HRAS, PTGS2, SRC, AKT1, MAPK1, PTK2, KRAS, VEGFA, MAPK3, RAC1, PIK3R1, AKT2                                                  |
| Rap1 signaling pathway               | 0.0000  | 0.0000  | PRKCA, PIK3CG, HRAS, DRD2, IGF1, HGF, KIT, EPHA2, SRC, AKT1, IGF1R, MAPK1, KRAS, RAC1, VEGFA, MAPK3, RHOA, FGF2, PIK3R1, AKT2               |
| Ras signaling pathway                | 0.0000  | 0.0000  | PRKCA, PIK3CG, HRAS, IGF1, HGF, KIT, EPHA2, AKT1, IGF1R, MAPK1, KRAS, VEGFA, MAPK3, RAC1, RHOA, ABL1, FGF2, PIK3R1, AKT2                    |
| PI3K-Akt signaling pathway           | 0.0000  | 0.0000  | PRKCA, PIK3CG, HRAS, CREB1, IGF1, CDK6, KIT, HGF, CDK4, CDK2, EPHA2, AKT1, IGF1R, MAPK1, PTK2, KRAS, RAC1, VEGFA, MAPK3, FGF2, PIK3R1, AKT2 |
| ErbB signaling pathway               | 0.0000  | 0.0000  | PRKCA, PIK3CG, AKT1, MAPK1, PTK2, HRAS, KRAS, MAPK3, ARAF, ABL1, PIK3R1, SRC, AKT2                                                          |
| HIF-1 signaling pathway              | 0.0000  | 0.0000  | PRKCA, PIK3CG, AKT1, MAPK1, IGF1R, MAPK3, VEGFA, IFNG, IGF1, NOS2, PIK3R1, AKT2                                                             |
| TNF signaling pathway                | 0.0000  | 0.0000  | PIK3CG, AKT1, MAPK1, TNF, PTGS2, CREB1, MMP9, MAPK3, IL1B, MMP14, PIK3R1, AKT2                                                              |
| mTOR signaling pathway               | 0.0000  | 0.0001  | PRKCA, PIK3CG, AKT1, MAPK1, TNF, MAPK3, IGF1, PIK3R1, AKT2                                                                                  |
| Toll-like receptor signaling pathway | 0.0000  | 0.0113  | PIK3CG, AKT1, MAPK1, TNF, MAPK3, RAC1, IL1B, PIK3R1, AKT2                                                                                   |
| GnRH signaling pathway               | 0.0000  | 0.0378  | PRKCA, MAPK1, HRAS, KRAS, MAPK3, MMP14, MMP2, SRC                                                                                           |
| Apoptosis                            | 0.0000  | 0.0393  | PIK3CG, AKT1, TNF, CYCS, APAF1, PIK3R1, AKT2                                                                                                |
| p53 signaling pathway                | 0.0000  | 0.0614  | SERPINB5, CYCS, IGF1, CDK6, APAF1, CDK4, CDK2                                                                                               |
| Melanogenesis                        | 0.0001  | 0.0696  | PRKCA, MAPK1, HRAS, TYR, KRAS, CREB1, MAPK3, KIT                                                                                            |
| MicroRNAs in cancer                  | 0.0001  | 0.1304  | PRKCA, HRAS, KRAS, PTGS2, SERPINB5, MMP9, VEGFA, RHOA, MMP16, CDK6, ABL1, PLAU                                                              |
| MAPK signaling pathway               | 0.0002  | 0.2439  | PRKCA, AKT1, MAPK1, HRAS, TNF, KRAS, MAPK3, RAC1, IL1B, FGF2, AKT2                                                                          |
| Glutathione metabolism               | 0.0016  | 1.9785  | GSTM1, GSTT1, IDH1, GGT1, GSTP1                                                                                                             |
| TGF-beta signaling pathway           | 0.0096  | 11.4085 | MAPK1, TNF, MAPK3, IFNG, RHOA                                                                                                               |
| NF-kappa B signaling pathway         | 0.0109  | 12.7813 | TNF, PTGS2, LCK, IL1B, PLAU                                                                                                                 |
| Cell cycle                           | 0.0349  | 35.8554 | CDK6, ABL1, CDK4, CCNA2, CDK2                                                                                                               |

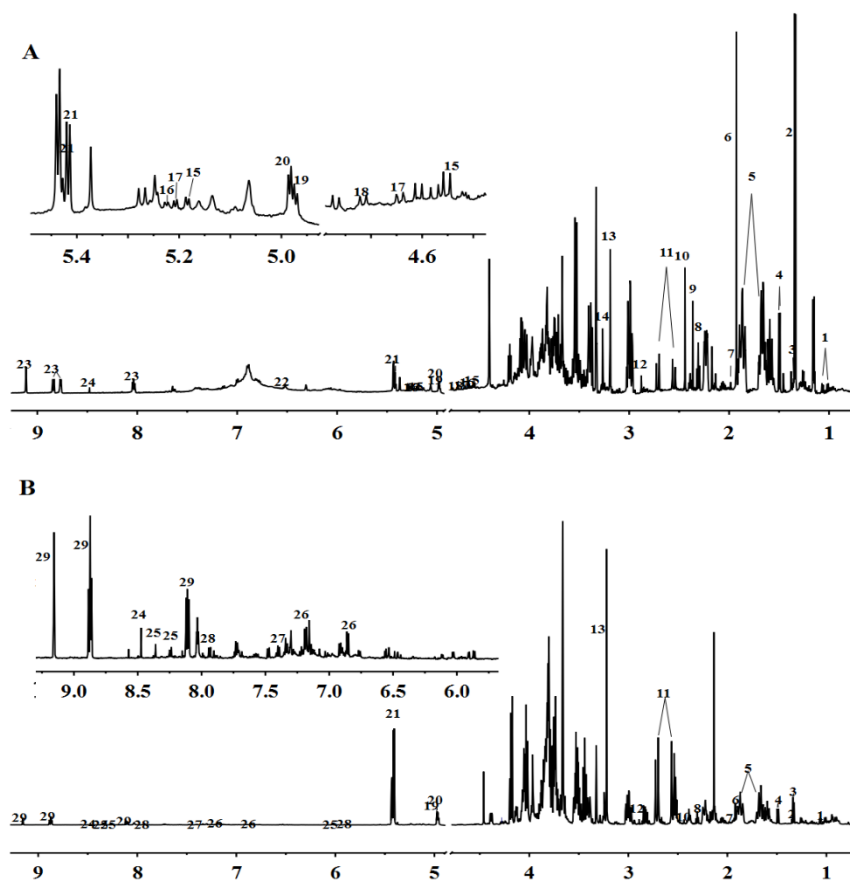

**Fig. S1** Typical 600 MHz hydrogen nuclear magnetic resonance spectra of red kidney bean coat and kernel extract. (A) coat, (B) kernel.

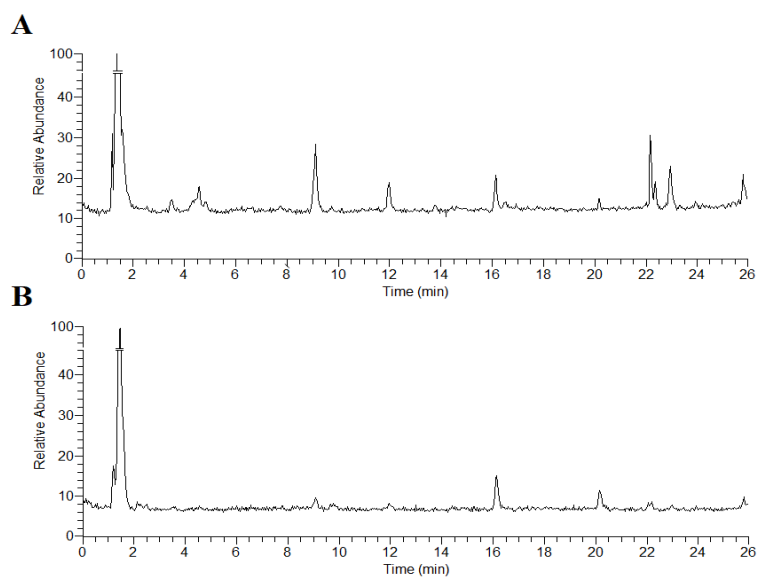

**Fig. S2** TICs obtained from the LC-MS from the RKBC extract. (A) TICs in negative ion modes. (B) TICs in positive ion modes.



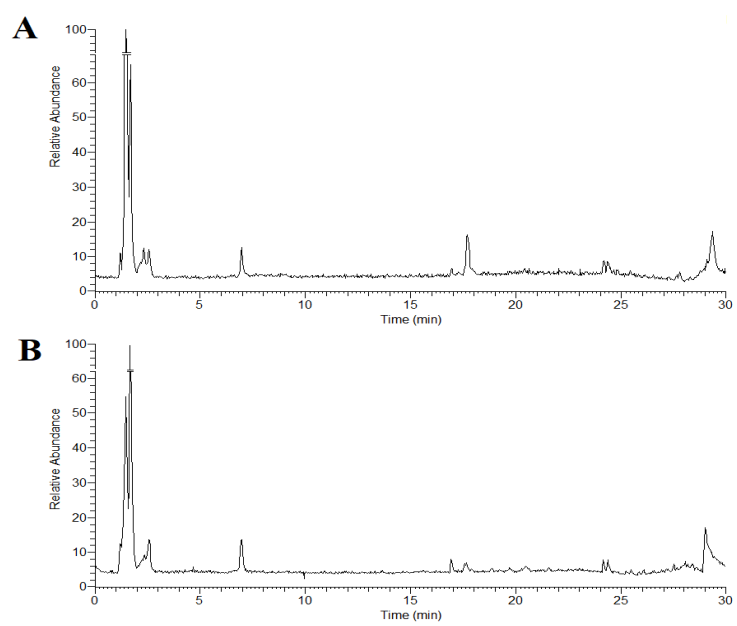

**Fig. S3** TICs obtained from the LC-MS from the RKBK extract. (A) TICs in negative ion modes. (B) TICs in positive ion modes.

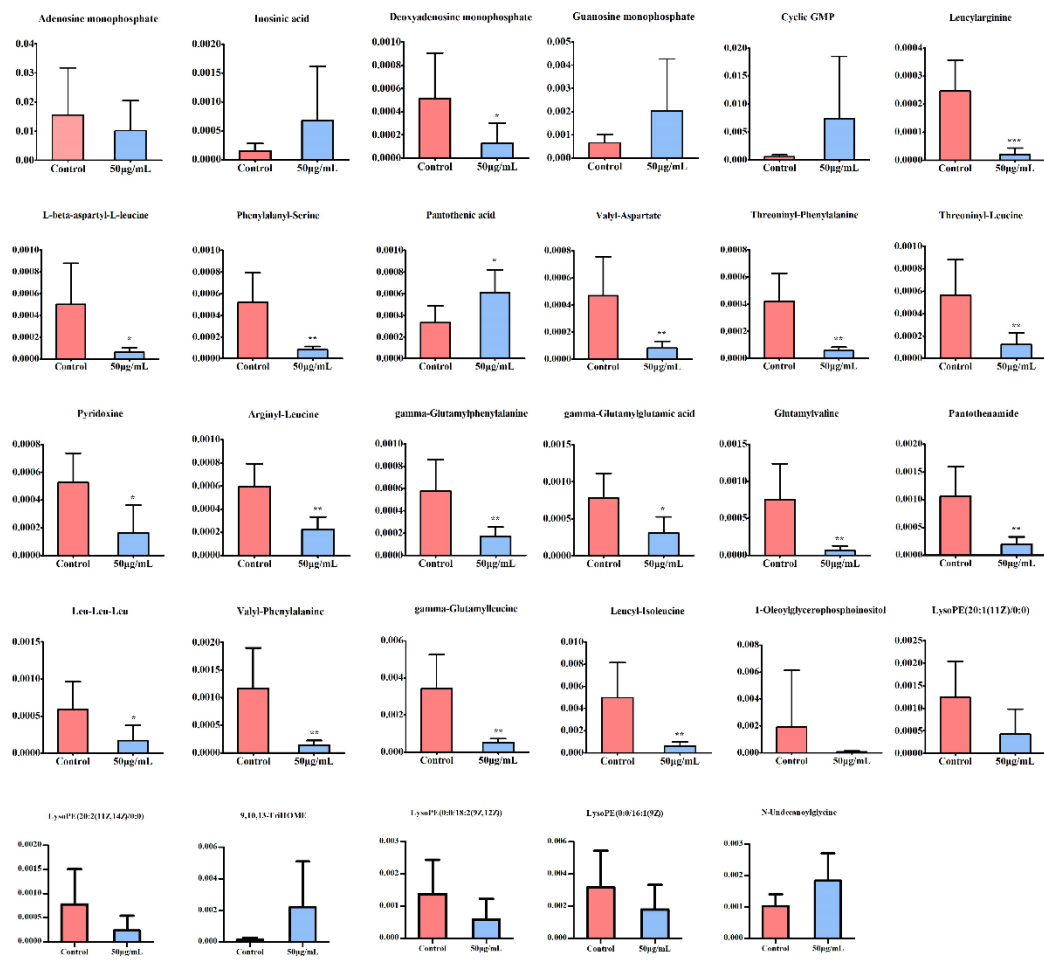

**Fig. S4** The histogram showing the levels of differential metabolites between control and the group treated with 50 µg/mL RKBC extract.

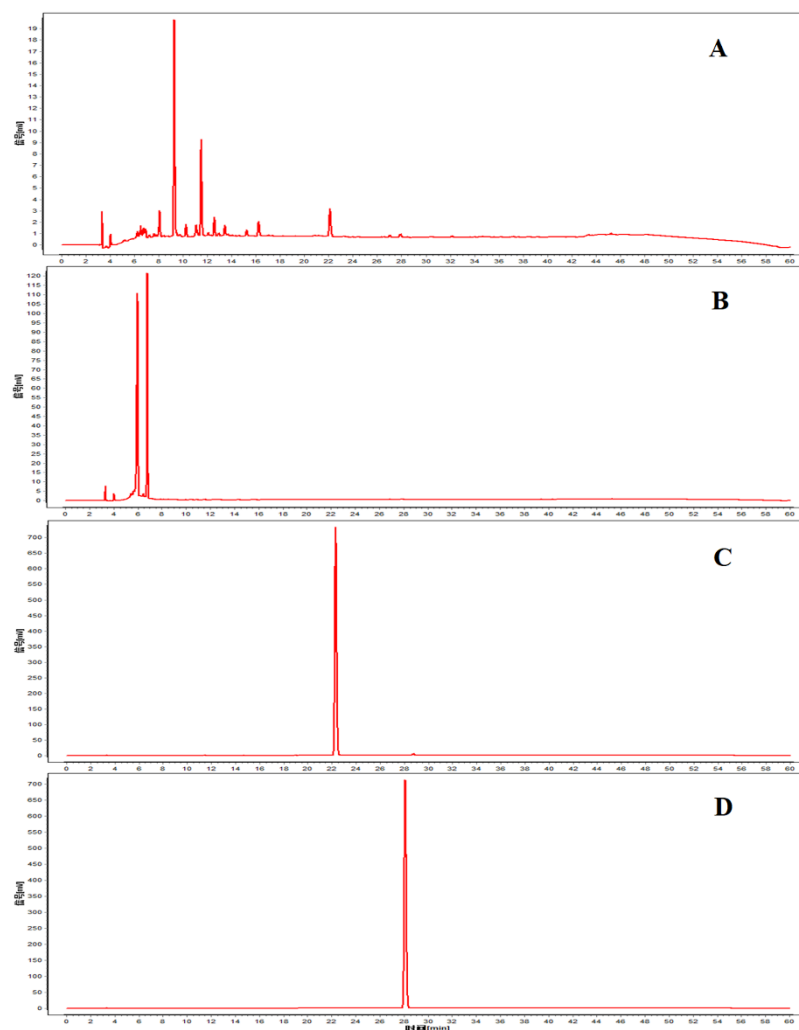

**Fig.S5** HPLC spectra obtained of RKBC extract (A), cyanidin-3-O-glucoside (B) quercetin (C), and kaempferol (D). Agela-venusil MP C18 column (4.6 mm×250 mm, 5  $\mu$ m, Waters) , with mobile phase consisting of 0.1% formic acid in water (phase A) and acetonitrile (phase B) at a flow rate of 1.0 mL/min. The gradient elution program was set as follows: 0-2 min, 90%-80% A; 2-40 min, 80%-45% A; 40-41 min, 45%-20% A; 41-45 min, 20%-20% A; 45-55 min, 20%-90% A; 55-60 min, 90%-90% A. The total chromatographic run time was 60 min. The injection volume was 5 $\mu$ L and the column temperature was at 30°C.
